# Supplementary material for: The Financial Impact of Inaccurate Blood Glucose Monitoring Systems
Source: PubMed Central journal article supplement (PMC5851223; doi:10.1177/1932296817731423), 2017-09-26
Supplement: Appendices_423.pdf [file Appendices_423.pdf]

## APPENDICES

### Appendix A: Comparing accuracy performance

The ISO assessments are not designed to rank systems. But if we want to further assess the performance of systems out of a certain accuracy class, we need a metric to divide our systems. Fulfillment rates of the assessment criteria are the obvious choice for such a ranking. But which of the criteria should we use? In the Freckmann et al. publication, we can find all results for the 15/20 (percentage of measurements within  $\pm 15$  mg/dL of the laboratory reference when blood glucose levels are  $< 75$  mg/dL and within  $\pm 20\%$  of the laboratory reference when levels are  $\geq 75$  mg/dL), 15/15 (percentage of measurements within  $\pm 15$  mg/dL of the laboratory reference when blood glucose levels are  $< 100$  mg/dL and within  $\pm 15\%$  of the laboratory reference when levels are  $\geq 100$  mg/dL), 10/10 and 5/5 criteria.

Obviously: for the 15/20 criteria, we see only relevant differences for the systems not compliant with the DIN EN ISO 15197:2003 – here, the values are below 95%. All the other systems are between 95% and 100%. Analogous, the 15/15 criteria shows only relevant differences for the systems not compliant with the DIN EN ISO 15197:2013. Due to the much better resolution, the 10/10 criteria as well as the 5/5 criteria show differences for all systems. So, those are the candidates for our sub-grouping. The resulting groups are the same for both criteria.

The median of all 22 systems compliant with the DIN EN ISO 15197:2013 is 92.2% fulfillment rate for the 10/10 criteria and 67.3% fulfillment rate for the 5/5 criteria.

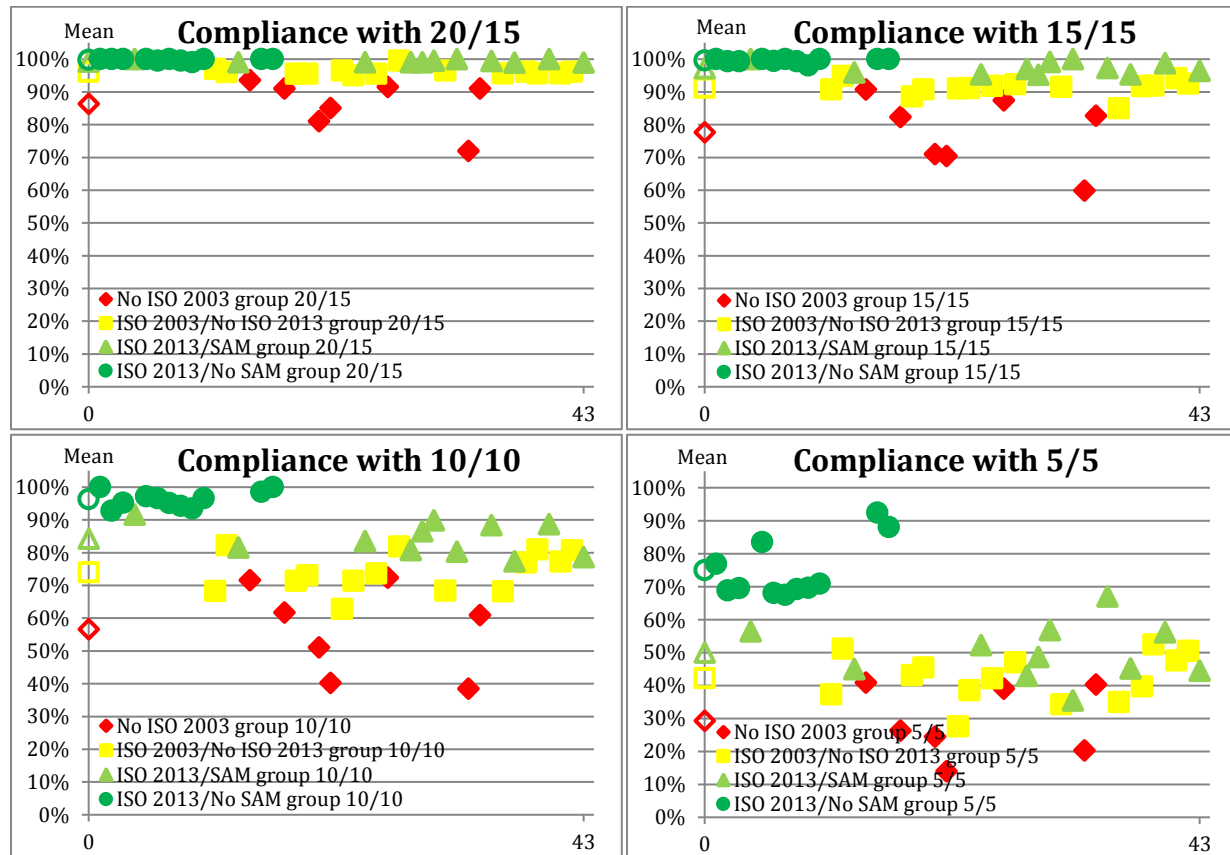

## Appendix B: Model range, Sensitivity Analyses

The study population in this analysis consists of patients with type 1 diabetes treated with CSII therapy. Baseline values were: 8.75% HbA1c; 2.86 SHE incidents PPY, 42 IU/day and 8.4 blood glucose tests per day.

### A. Model range

The model proposed in the previous publication is linear for HbA1c, insulin consumption and number of blood glucose tests per day but non-linear (logistic) for severe hypoglycemia. Obviously, such models have limitations: in a certain range, they will predict impossible results as negative values. We've checked the model for such limitations and found out that the results are reliable in the following ranges:

|                           | <b>HbA1c</b><br>[%] | <b>SHE</b><br>[Cases PPY] | <b>Insulin consumption</b><br>[IU/d] | <b>Fingersticks</b><br>[Tests/d] |
|---------------------------|---------------------|---------------------------|--------------------------------------|----------------------------------|
| Analyzed (reliable) range | 6 - 15              | 0.4 - 40                  | 5 - 500                              | 1 - 50                           |

### B. Analyzed populations

The four used variables are not independent, so a one-way sensitivity analysis as done in the previous chapter doesn't lead to realistic results. For our analysis of sensitivity and possible extremes, we used some pre-defined populations with quite extreme but not unrealistic parameters.

| <b>Population</b>  | <b>HbA1c</b><br>[%] | <b>SHE</b><br>[Cases PPY] | <b>Insulin consumption</b><br>[IU/d] | <b>Fingersticks</b><br>[Tests/d] | <b>Average Additional Cost</b><br>[£ PPY] | <b>Extreme Additional Cost</b><br>[£ PPY] |
|--------------------|---------------------|---------------------------|--------------------------------------|----------------------------------|-------------------------------------------|-------------------------------------------|
| Baseline           | 8.75                | 2.86                      | 41.80                                | 8.37                             | 155                                       | 597                                       |
| Well controlled    | 7.50                | 0.50                      | 30.00                                | 5.00                             | 101                                       | 362                                       |
| Aggressive therapy | 6.50                | 5.00                      | 60.00                                | 10.00                            | 219                                       | 896                                       |
| High HbA1c         | 10.00               | 1.50                      | 41.80                                | 3.00                             | 95                                        | 294                                       |
